# Supplementary material
Source: Research Square preprint supplement (doi:10.21203/rs.3.rs-8707273/v1)
Supplement: Supplementary file 1 [file f3c4e6b863c563df2ab1a6ec.docx]

**Determination and comparison of triacylglycerol composition of tea (*Camellia sinensis*) oil and extra virgin olive oil using 1H NMR and UV–Visible spectroscopy**

Hagos Tesfaya,b,*, Girma Workeneh Woyessaa,b,c, Amitabha Dattad,*

a *Sustainable Chemical Science and Technology, Taiwan International Graduate Program, Taiwan, ROC*

b *Institute of Chemistry, Academia Sinica, Nankang, Taipei - 11529, Taiwa, ROC*

c *Harc Department of Chemistry, Haramaya University, P.O. Box 138, Haramaya, Ethiopia*

d *Department of Chemistry, National Changhua University of Education, Changhua – 50058, Taiwan, ROC*

*Corresponding author. E-mail address: [hagtes76@gmail.com](mailto:hagtes76@gmail.com) (H. Tesfay); [amitd_ju@yahoo.co.in](mailto:amitd_ju@yahoo.co.in) (A. Datta)

| **Table S1.** Assignment of signals of Tea Oil by 1HNMR (400MHz) | | | | | | |
| --- | --- | --- | --- | --- | --- | --- |
| **Signals** | **Functional group** | | | **Integral values** | **Multiplicity** | **Chemical shift in [ppm]** |
| Integral a | | C-CH=CH-C (O, L, Ln) | | 8.8405 | m | 5.3228 |
| Integral b | | CH(-C-O-CO-C-)2 | | 1.4116 | m | 5.2296 |
| Integral c | | -C-CH2-O-CO-C | | 2.9491 | dd | 4.2662 |
| Integral d | | -C-CH2-O-CO-C | | 2.9921 | dd | 4.1145 |
| Integral e | | C=C-CH2-C=C- (L, Ln) | | 1.0000 | t | 2.7542 |
| Integral f | | -CH2-CO2-(acyl group) | | 9.0473 | dt | 2.2842 |
| Integral g | | -C-CH2-C=C- | | 15.8541 | m | 1.9937 |
| Integral h | | -OCO-CH2-CH2-(S, O, L, Ln) | | 9.3066 | m | 1.5799 |
| Integral i | | -(CH2)n- ( S, O, Ln, ) | | 90.1324 | m | 1.2715 |
| Integral j | | | -CH3 (Saturated, oleic and linoleic acyl group) | 13.1659 | t | 0.8534 |
| | **Table S2** Assignment of signals for Tea Oil and Extra virgin olive oil by 1H-NMR (800MHz | | | | | | | | --- | --- | --- | --- | --- | --- | --- | | **Signals** | **Functional group** | **Integral**  **Tea Oil** | **Integral Extra virgin**  **Olive Oil** | **Multiplicity** | **Chemical shift**  **ν[ppm]** | | | | **Tea Oil** | **Olive Oil** | | | Integral a | C-CH=CH-C (O, L, Ln) | 604.6591 | 559.8718 | m | 5.3188 | 5.2689 | | | Integral b | CH(-C-O-CO-C-)2 | 100.0000 | 100.0000 | m | 5.2398 | 5.1939 | | | Integral c | -C-CH2-O-CO-C | 202.2609 | 201.9361 | dd | 4.2795 | 4.2333 | | | Integral d | -C-CH2-O-CO-C | 207.3650 | 206.9198 | dd | 4.1134 | 4.0675 | | | Integral e | OH group of digly. | 1.7691 | -0.0818 | d | 3.6857 | 3.6382 | | | Integral f | -C=C-CH2-C=C-CH2-C=C | 4.7689 | 3.0805 | t | 2.7786 | 2.7325 | | | Integral g | -C=C-CH2-C=C- | 62.9605 | 25.0211 | t | 2.7402 | 2.6950 | | | Integral h | -C-CH2-C=C- | 620.7392 | 603.7743 | t | 2.2904 | 2.2384 | | | Integral i | -CH2-CO2-(acyl group) | 1059.5427 | 1032.0033 | m | 2.0045 | 1.9410 | | | Integral j | -OCO-CH2-CH2-(S, O, L, Ln acyl group) | 616.0515 | 597.8680 | m | 1.5934 | 1.5462 | | | Integral k | -(CH2)n- ( S, O, Ln, acyl group) | 5466.2712 | 5756.4934 | m | 1.2790 | 1.2205 | | | Integral l | -CH3 (linolenic acyl group) | -3.7805 | -3.2936 | - | 0.9373 | 0.8954 | | | Integral m | -CH3 (Saturated, oleic and linoleic acyl group) | 880.6528 | 886.1946 | t | 0.8491 | 0.8014 | | | Where O=Oleic, S=Saturated, L=linoleic, Ln= linolenic acyl groups | | | | | | |  | **Table S3.** Typical levels in (%) of C18 unsaturated fatty acids and saturated fatty acids in common oils. | | | | | | --- | --- | --- | --- | --- | | Oil | Linoleic | Linolenic | Oleic | Saturated | | Tea Oil** | 10.14 | 0.38 | 74.83 | 14.65 | | Extra Virgin olive Oil** | 4.14 | 0.26 | 81.06 | 14.54 | | Extra Virgin Olive Oil[22] | 4.2 | 0.7 | 82.9 | 12.2 | | 4.1 | 0.5 | 84.5 | 10.9 | | 9.1 | 0.3 | 78.5 | 12.1 | | Tea (C. tenuifolia) seed oil[11] | 12.2 | ND | 66.2 | 8.0 | | Camellia japonica [12] | 6.65 | 0.29a | 80.67 | 12.39 | | Olive oil[19] | 6.0 | 0.7 | 81.3 | 12 | | Tea seed oil[15] | 22.3 | 0.0 | 57.5 | 18.6 | | Peanut[16] | 18.2 | 0.0 | 71.1 | 10.7 | | Cotton seed oil [18] | 49.97 | 0 | 19.24 | 0 | | Sunflower[16] | 62.2 | 0.0 | 0 | 9.4 | | Rice bran[16] | 33.1 | ND | ND | 22.5 | | Sunflower oil [18] | 12.13 | 0 | 79.22 | 0 | | Soybean[23] | 45.0 | 13.3 | 24.1 | 17.3 | | Coconut[16] | 1.6 | 0 | 6.2 | 92.11 | | *** Current work, ND=not detected* | | | | | | | | | | | |

**Figure S1**: 13CNMR of tea oil sample


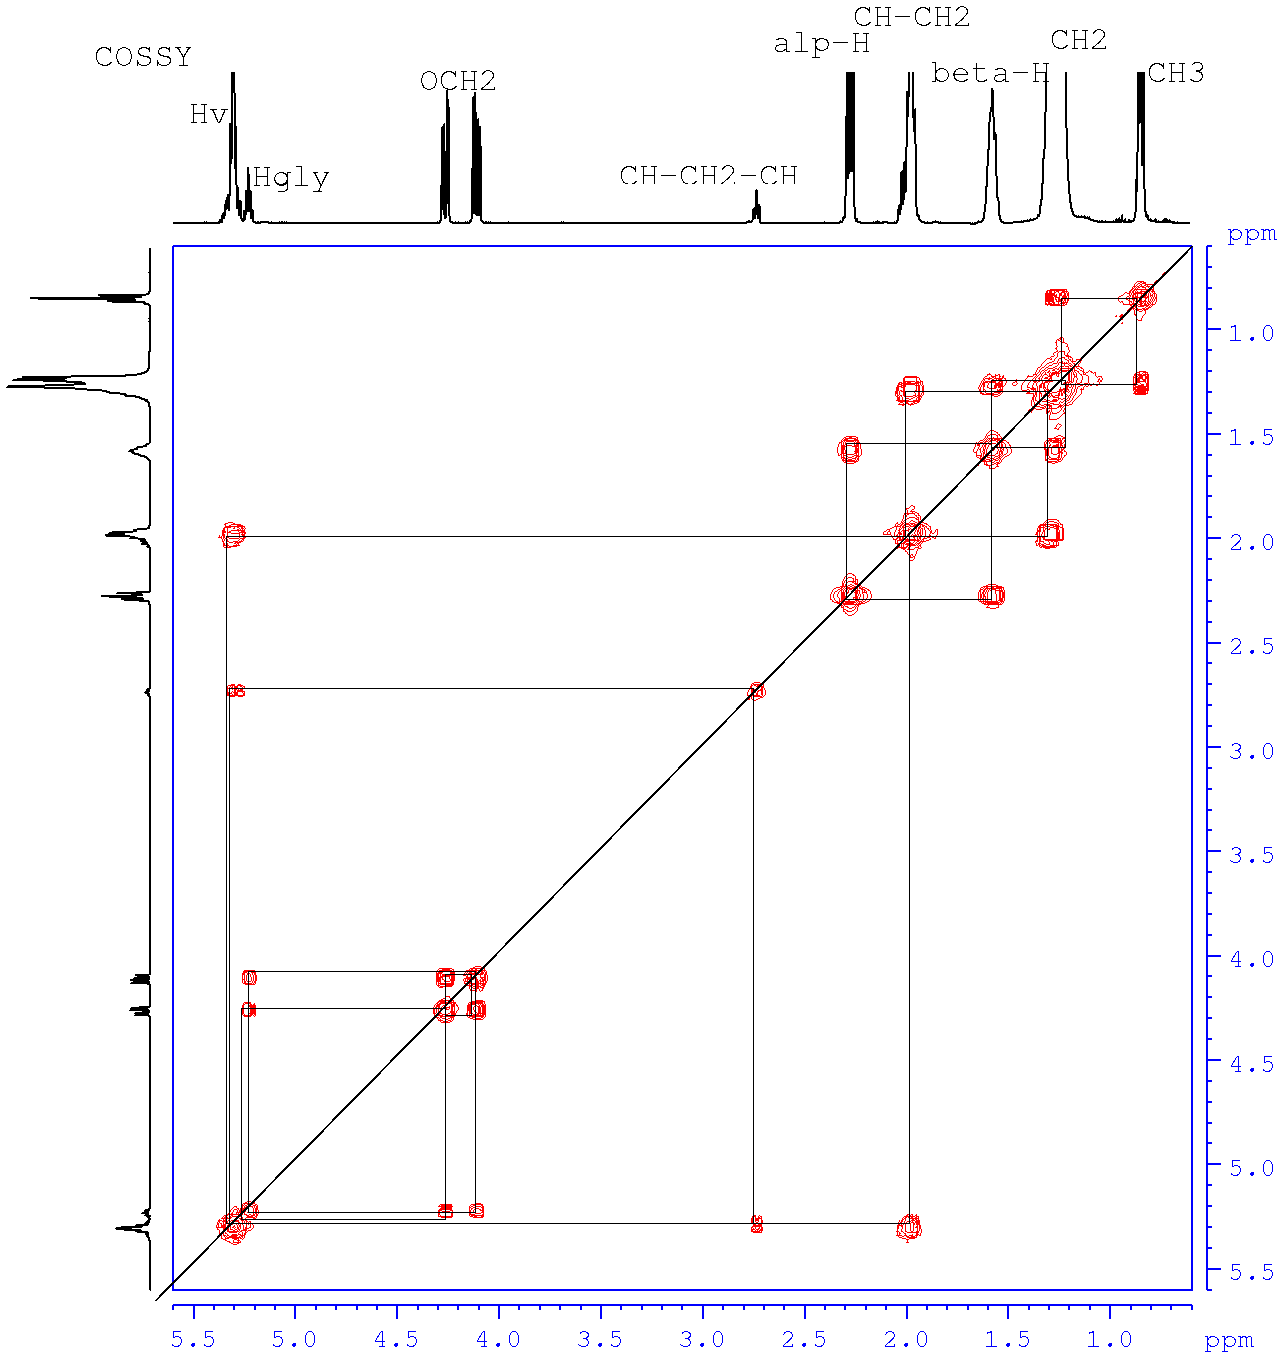


**Figure S2**:2D-COSSY NMR spectrum of tea oil
